# Supplementary material for: Systemic Effects of a Phage Cocktail on Healthy Weaned Piglets
Source: MDPI journal article supplement (doi:10.3390/biology13040271), 2024-04-18
Supplement: s1 [file s1]

## Supplemental material

Table S1. The lysis spectrum of five phages in the cocktail

| Strains          | Accession No. | Antibiotic Resistance* <sup>1</sup> | C1 | S19cd* <sup>2</sup> | 143_2 | N2 | C6 |
|------------------|---------------|-------------------------------------|----|---------------------|-------|----|----|
| <i>E.coli</i> 11 | MH671408      | AMP, TE                             |    |                     |       |    |    |
| <i>E.coli</i> 12 | MH671409      | AMP, TE, C, CN                      |    |                     | ✓     |    |    |
| <i>E.coli</i> 13 | MH671410      | AMP, TE, C, CN, ENR, EFT            |    |                     | ✓     |    | ✓  |
| <i>E.coli</i> 14 | MH671411      | AMP, TE, C, CN, ENR, EFT            |    |                     |       |    |    |
| <i>E.coli</i> 15 | MH671412      | AMP, TE, C                          |    |                     |       |    |    |
| <i>E.coli</i> 22 | MH671413      | AMP, TE, C, CN                      |    |                     | ✓     | ✓  | ✓  |
| <i>E.coli</i> 24 | MH671414      | AMP, TE, C, CN, ENR                 |    |                     |       |    |    |
| <i>E.coli</i> 31 | MH671415      | AMP, TE, C                          |    |                     |       |    |    |
| <i>E.coli</i> 33 | MH671416      | AMP, TE, ENR                        | ✓  |                     |       |    |    |
| <i>E.coli</i> 34 | MH671417      | AMP, TE, C                          |    |                     |       |    |    |
| <i>E.coli</i> 36 | MH671419      | AMP, TE, C, ENR, EFT                |    |                     |       |    |    |
| <i>E.coli</i> 37 | MH671420      | None                                |    |                     |       |    |    |
| <i>E.coli</i> 38 | MH671421      | AMP, TE, EFT                        |    |                     | ✓     | ✓  |    |
| <i>E.coli</i> 41 | MH671422      | AMP, TE, CN, ENR                    |    |                     |       |    |    |
| <i>E.coli</i> 42 | MH671423      | AMP, TE, C, CN                      | ✓  |                     |       |    |    |
| <i>E.coli</i> 44 | MH671425      | AMP, TE, C, CN                      |    | ✓                   |       |    | ✓  |
| <i>E.coli</i> 45 | MH671426      | AMP, TE, C, CN, ENR                 |    |                     |       |    | ✓  |
| <i>E.coli</i> 46 | MH671427      | AMP, TE, C                          |    |                     | ✓     |    |    |
| <i>E.coli</i> 47 | MH671428      | AMP, TE, CN, EFT                    |    |                     |       |    |    |
| <i>E.coli</i> 51 | MH671429      | AMP, TE, C                          |    |                     |       |    | ✓  |
| <i>E.coli</i> 52 | MH671430      | AMP, TE, C, CN, ENR                 |    |                     |       |    |    |
| <i>E.coli</i> 54 | MH671431      | AMP, TE, C, CN                      |    |                     |       |    |    |
| <i>E.coli</i> 56 | MH671432      | AMP, TE, C                          |    |                     |       |    |    |
| <i>E.coli</i> 57 | MH671433      | AMP, TE, C, CN, ENR                 |    |                     | ✓     |    |    |
| <i>E.coli</i> 58 | MH671434      | AMP, TE, C, CN                      |    |                     |       | ✓  |    |
| <i>E.coli</i> 61 | MH671435      | AMP, TE, C, ENR                     |    |                     |       |    |    |
| <i>E.coli</i> 62 | MH671436      | AMP, TE, CN, ENR                    |    |                     | ✓     |    |    |
| <i>E.coli</i> 63 | MK156384      | AMP, TE, C, CN                      |    |                     |       |    |    |
| <i>E.coli</i> 71 | MH671437      | AMP, TE, C, CN, ENR                 |    |                     |       |    |    |
| <i>E.coli</i> 72 | MH671438      | AMP, TE, C, CN, ENR, EFT            |    |                     | ✓     |    |    |
| <i>E.coli</i> 73 | MH671439      | AMP, TE, C, CN, ENR                 |    |                     |       |    |    |
| <i>E.coli</i> 81 | MH671440      | AMP, TE, CN                         |    |                     | ✓     |    |    |
| <i>E.coli</i> 82 | MH671441      | AMP, TE, CN, ENR                    |    |                     |       |    |    |
| <i>E.coli</i> 83 | MH671442      | AMP, TE, C, CN, ENR                 |    |                     |       |    |    |
| <i>E.coli</i> 84 | MH671443      | AMP, TE, CN                         |    |                     |       |    |    |
| <i>E.coli</i> 85 | MH671444      | AMP, TE, CN, ENR                    |    |                     |       |    |    |
| <i>E.coli</i> 86 | MH671445      | AMP, TE, C                          |    |                     |       | ✓  | ✓  |
| <i>E.coli</i> 87 | MH671446      | AMP, TE, CN, ENR                    |    |                     |       |    |    |
| <i>E.coli</i> 91 | MH671447      | AMP, TE, CN                         |    |                     | ✓     |    |    |

|                   |          |                          |   |   |   |
|-------------------|----------|--------------------------|---|---|---|
| <i>E.coli</i> 94  | MH671448 | AMP, TE, C, CN           |   |   |   |
| <i>E.coli</i> 95  | MH671449 | AMP, TE, CN              |   |   |   |
| ETEC 101          | MH671450 | AMP, TE, C               |   |   |   |
| ETEC 102          | MH671451 | TE                       |   |   |   |
| ETEC 103          | MH671452 | AMP, TE, C, CN, ENR      |   |   |   |
| ETEC 104          | MH671453 | AMP, TE                  | √ | √ | √ |
| ETEC 105          | MH671454 | TE, C, CN, ENR           |   |   |   |
| ETEC 106          | MK615932 | None                     |   | √ | √ |
| <i>E.coli</i> 121 | MH671455 | AMP, TE, CN, ENR         | √ |   |   |
| <i>E.coli</i> 122 | MH671456 | AMP, TE, C, CN, EFT      | √ |   |   |
| <i>E.coli</i> 123 | MH671457 | AMP, TE, C               |   |   |   |
| <i>E.coli</i> 131 | MH671458 | AMP, TE, C, CN, EFT      | √ |   |   |
| <i>E.coli</i> 132 | MH671459 | AMP                      |   |   |   |
| <i>E.coli</i> 133 | MH671460 | AMP, TE, C, CN, ENR      |   |   |   |
| <i>E.coli</i> 141 | MH671461 | AMP, C                   |   |   |   |
| <i>E.coli</i> 142 | MH671462 | AMP, TE, C, CN, ENR      |   |   |   |
| <i>E.coli</i> 143 | MH671463 | AMP, TE, C, CN           |   | √ | √ |
| <i>E.coli</i> 145 | MH671465 | AMP, TE, C, CN, EFT      | √ |   |   |
| <i>E.coli</i> 151 | MH671466 | AMP, TE, C, ENR, EFT     |   |   |   |
| <i>E.coli</i> 156 | MH671467 | AMP                      |   |   |   |
| <i>E.coli</i> 161 | MH671468 | CN                       |   |   |   |
| <i>E.coli</i> 162 | MH671469 | AMP, TE, C, CN, ENR      |   | √ | √ |
| <i>E.coli</i> 164 | MH671470 | AMP, TE, C, CN, EFT      | √ |   |   |
| <i>E.coli</i> 171 | MH671471 | AMP, TE, C, CN, ENR      |   |   |   |
| <i>E.coli</i> 172 | MH671472 | AMP, TE, C               |   | √ | √ |
| <i>E.coli</i> 173 | MH671473 | AMP, TE, C, EFT          |   |   | √ |
| <i>E.coli</i> 174 | MH671474 | AMP, TE, CN              |   |   |   |
| <i>E.coli</i> 181 | MH671475 | AMP, TE, C, CN, ENR      |   | √ |   |
| <i>E.coli</i> 182 | MH671476 | AMP, TE, C               |   |   |   |
| <i>E.coli</i> 191 | MH671477 | AMP, TE, C, CN           |   | √ | √ |
| <i>E.coli</i> 192 | MH671478 | AMP, TE, C, CN, EFT      | √ | √ |   |
| <i>E.coli</i> 193 | MH671479 | AMP, TE, C               |   | √ |   |
| <i>E.coli</i> 202 | MH671481 | AMP, TE, C, ENR          |   |   |   |
| <i>E.coli</i> 203 | MH671482 | AMP, TE, C, ENR, EFT     |   |   |   |
| <i>E.coli</i> 211 | MH671483 | AMP, TE                  |   |   |   |
| <i>E.coli</i> 212 | MH671484 | AMP, TE, CN, ENR         |   |   |   |
| <i>E.coli</i> 231 | MH671486 | TE, C, CN, ENR, EFT      |   |   |   |
| <i>E.coli</i> 232 | MH671487 | AMP, TE, C, CN, ENR      |   |   |   |
| <i>E.coli</i> 233 | MH671488 | AMP, TE, C, CN, ENR, EFT |   |   |   |
| <i>E.coli</i> 234 | MH671489 | AMP, TE, C               |   |   |   |
| <i>E.coli</i> 235 | MH671490 | AMP, TE, C               |   |   | √ |
| <i>E.coli</i> 236 | MH671491 | AMP, TE, C, ENR, EFT     |   | √ |   |
| <i>E.coli</i> 237 | MH671492 | AMP, TE, C, ENR, EFT     |   | √ | √ |

|                   |          |                          |   |   |   |
|-------------------|----------|--------------------------|---|---|---|
| <i>E.coli</i> 241 | MH671493 | AMP, TE, C, CN, ENR      |   |   | ✓ |
| <i>E.coli</i> 242 | MH671494 | AMP, TE, C, ENR, EFT     | ✓ | ✓ | ✓ |
| <i>E.coli</i> 243 | MH671495 | AMP, TE, C               |   |   |   |
| <i>E.coli</i> 244 | MH671496 | AMP, TE                  |   |   |   |
| <i>E.coli</i> 245 | MH671497 | AMP, TE, C, CN, ENR      |   |   |   |
| <i>E.coli</i> W1  | MN086362 | AMP, TE, C, CN, ENR, EFT |   |   |   |
| <i>E.coli</i> W3  | MN086363 | AMP, TE, C, CN, ENR, EFT |   |   |   |
| <i>E.coli</i> W5  | MN086364 | AMP, TE, C, CN, ENR, EFT | ✓ |   |   |

Note: \*1, The antibiotics used for resistance tests were gentamicin (CN), ampicillin (AMP), ceftiofur (EFT), tetracycline (TE), chloramphenicol (C) and enoxacin (ENR); \*2, S19cd can also infect two pathogenic bacterial strains (ATCC 13312 and CICC 21493) of *Salmonella enterica* serovar Choleraesuis.

Table S2. Effects of phage cocktail on the growth performance of piglets

| Indexes                   | CON          | Phage        | <i>P</i> -value |
|---------------------------|--------------|--------------|-----------------|
| Initial body weight (kg)  | 6.26±0.11    | 6.56±0.18    | 0.190           |
| Terminal body weight (kg) | 14.23±0.36   | 15.05±0.50   | 0.212           |
| ADG (g/d)                 | 394.25±14.41 | 424.58±20.19 | 0.249           |
| ADFI (g/d)                | 640.30±70.02 | 731.19±55.31 | 0.332           |
| Feed intake/Gain          | 1.71±0.07    | 1.76±0.08    | 0.687           |

Table S3. Effects of phage cocktail on the serum biochemical indices of piglets

| Indexes        | Day 11     |            |                 | Day 21      |              |                 |
|----------------|------------|------------|-----------------|-------------|--------------|-----------------|
|                | CON        | Phage      | <i>P</i> -value | CON         | Phage        | <i>P</i> -value |
| GLU (mmol/L)   | 5.68±0.31  | 4.31±0.74  | 0.131           | 5.76±0.58   | 6.60±0.57    | 0.327           |
| ALB (g/L)      | 24.08±0.51 | 22.92±0.69 | 0.205           | 21.25±1.84  | 22.43±0.62   | 0.556           |
| ALT (U/L)      | 53.63±6.26 | 54.05±6.52 | 0.964           | 80.93±11.54 | 113.45±17.07 | 0.146           |
| AST (U/L)      | 66.3±4.77  | 79.23±8.6  | 0.218           | 89.77±7.60  | 129.55±19.65 | 0.088           |
| BUN (mmol/L)   | 1.66±0.25  | 1.62±0.31  | 0.926           | 1.36±0.17   | 1.18±0.18    | 0.488           |
| HDL-C (mmol/L) | 0.95±0.14  | 1.07±0.06  | 0.461           | 1.02±0.08   | 1.17±0.10    | 0.258           |
| LDL-C (mmol/L) | 1.45±0.08  | 1.41±0.08  | 0.736           | 1.66±0.10   | 1.63±0.07    | 0.839           |
| TCHO (mmol/L)  | 2.53±0.18  | 2.66±0.1   | 0.546           | 2.77±0.13   | 2.82±0.15    | 0.789           |
| TG (mmol/L)    | 0.44±0.04  | 0.54±0.06  | 0.211           | 0.59±0.05   | 0.59±0.05    | 1.000           |
| TP (g/L)       | 36.57±1.83 | 34.95±1.37 | 0.496           | 37.93±1.72  | 40.28±1.67   | 0.350           |

Note: GLU, glucose; ALB, albumin; ALT, alanine aminotransferase; AST, aspartate aminotransferase; BUN, blood urea nitrogen; HDL-C, high-density lipoprotein cholesterol; LDL-C, low-density lipoprotein cholesterol; TCHO, total cholesterol; TG, triglyceride; TP, total protein.

Table S4. Effects of phage cocktail on the blood routine indices of piglets

| Indexes                   | Day 11       |              |                 | Day 21                 |                        | <i>P</i> -value |
|---------------------------|--------------|--------------|-----------------|------------------------|------------------------|-----------------|
|                           | CON          | Phage        | <i>P</i> -value | CON                    | Phage                  |                 |
| WBC (10 <sup>9</sup> /L)  | 18.39±3.24   | 16.07±0.81   | 0.514           | 24.05±2.94             | 22.67±0.95             | 0.672           |
| Neu (10 <sup>9</sup> /L)  | 5.57±1.20    | 5.80±1.14    | 0.893           | 4.89±0.86              | 5.72±0.72              | 0.477           |
| Lym (10 <sup>9</sup> /L)  | 11.93±3.41   | 9.32±1.22    | 0.486           | 16.73±2.26             | 15.12±0.91             | 0.523           |
| Mon (10 <sup>9</sup> /L)  | 0.73±0.12    | 0.82±0.08    | 0.569           | 2.09±0.46              | 1.53±0.05              | 0.280           |
| Eos (10 <sup>9</sup> /L)  | 0.11±0.01    | 0.10±0.02    | 0.538           | 0.25±0.06              | 0.17±0.04              | 0.301           |
| Bas (10 <sup>9</sup> /L)  | 0.05±0.01    | 0.04±0.01    | 0.591           | 0.09±0.02 <sup>a</sup> | 0.14±0.01 <sup>b</sup> | 0.037           |
| Neu (%)                   | 33.63±5.89   | 36.08±6.63   | 0.788           | 20.52±3.38             | 25.15±2.85             | 0.319           |
| Lym (%)                   | 60.88±6.69   | 57.97±6.88   | 0.768           | 70.03±3.98             | 66.73±2.97             | 0.522           |
| Mon (%)                   | 4.53±0.84    | 5.08±0.49    | 0.583           | 8.10±1.49              | 6.80±0.30              | 0.412           |
| Eos (%)                   | 0.70±0.14    | 0.62±0.16    | 0.700           | 0.97±0.25              | 0.73±0.15              | 0.438           |
| Bas (%)                   | 0.25±0.04    | 0.25±0.04    | 1.000           | 0.33±0.05 <sup>a</sup> | 0.58±0.08 <sup>b</sup> | 0.027           |
| RBC (10 <sup>12</sup> /L) | 6.15±0.26    | 5.90±0.44    | 0.635           | 5.98±0.26              | 6.07±0.28              | 0.821           |
| HGB (g/L)                 | 114.67±6.08  | 104.17±3.33  | 0.161           | 105.67±1.74            | 104.17±1.11            | 0.485           |
| HCT (%)                   | 33.8±1.81    | 30.47±0.92   | 0.132           | 32.88±0.68             | 31.43±0.37             | 0.091           |
| MCV (fL)                  | 54.93±1.95   | 52.33±2.08   | 0.382           | 55.28±1.52             | 52.28±1.78             | 0.229           |
| MCH (pg)                  | 18.65±0.79   | 17.90±0.74   | 0.504           | 17.83±0.71             | 17.32±0.64             | 0.603           |
| MCHC (g/L)                | 339.5±3.37   | 341.83±1.82  | 0.560           | 322.17±4.98            | 331.17±2.07            | 0.126           |
| RDW-CV (%)                | 21.75±0.89   | 22.27±0.92   | 0.695           | 20.83±0.53             | 21.72±1.02             | 0.462           |
| RDW-SD (fL)               | 42.62±2.13   | 41.58±0.83   | 0.666           | 40.75±1.33             | 39.83±0.99             | 0.593           |
| PLT (10 <sup>9</sup> /L)  | 341.83±44.23 | 444.33±64.81 | 0.221           | 468.33±73.00           | 483.83±29.24           | 0.848           |
| MPV (fL)                  | 9.27±0.37    | 7.63±1.42    | 0.292           | 8.67±0.19              | 8.50±0.23              | 0.592           |
| PDW (%)                   | 15.35±0.19   | 15.15±0.12   | 0.402           | 15.65±0.11             | 15.4±0.16              | 0.228           |
| PCT (%)                   | 0.32±0.04    | 0.41±0.06    | 0.227           | 0.40±0.06              | 0.41±0.03              | 0.915           |

Note: WBC, white blood cells; Neu, neutrophils; Lym, lymphocytes; Mon, monocytes; Eos, Eosinophils; Bas, Basophils; RBC, red blood cells; HGB, hemoglobin; HCT, hematocrit; MCV, mean corpuscular volume; MCH, mean corpuscular hemoglobin; MCHC, mean corpuscular hemoglobin concentration; RDW-CV, red blood cell distribution width variation coefficient; RDW-SD, red blood cell distribution width standard deviation; PLT, platelet count; MPV, mean platelet volume; PDW, platelet distribution width; PCT, platelet-crit.

Note: Different superscript letters in the same row indicate significant differences between groups ( $P < 0.05$ ).

Table S5. Effects of phage cocktail on the relative weight of organs in piglets

| Organs (%) | CON                    | Phage                  | <i>P</i> -value |
|------------|------------------------|------------------------|-----------------|
| Heart      | 0.56±0.02              | 0.59±0.02              | 0.382           |
| Liver      | 2.93±0.13              | 3.01±0.15              | 0.699           |
| Spleen     | 0.28±0.02              | 0.24±0.01              | 0.136           |
| Pancreas   | 0.25±0.02 <sup>a</sup> | 0.20±0.12 <sup>b</sup> | 0.050           |
| Kidney     | 0.59±0.03              | 0.57±0.01              | 0.546           |

Note: Different superscript letters in the same row indicate significant differences between groups ( $P < 0.05$ ).

Table S6. Effects of phage cocktail on the relative weight and length of different intestinal segments of piglets

| Segment | Indexes                   | CON                    | Phage                  | <i>P</i> -value |
|---------|---------------------------|------------------------|------------------------|-----------------|
| Jejunum | Relative length (cm/kg)   | 63.49±2.46             | 68.45±1.43             | 0.103           |
|         | Relative total weight (%) | 4.26±0.33              | 4.16±0.22              | 0.803           |
|         | Relative net weight (%)   | 3.55±0.23              | 3.56±0.17              | 0.983           |
| Ileum   | Relative length (cm/kg)   | 1.27±0.16              | 1.72±0.15              | 0.071           |
|         | Relative total weight (%) | 0.11±0.02              | 0.14±0.01              | 0.189           |
|         | Relative net weight (%)   | 0.09±0.01 <sup>a</sup> | 0.14±0.01 <sup>b</sup> | 0.024           |
| Cecum   | Relative total weight (%) | 0.46±0.10              | 0.62±0.09              | 0.271           |
|         | Relative net weight (%)   | 0.21±0.01              | 0.22±0.01              | 0.58            |
| Colon   | Relative length (cm/kg)   | 10.07±0.92             | 9.95±0.83              | 0.922           |
|         | Relative total weight (%) | 2.61±0.23              | 2.35±0.17              | 0.388           |

Note: Different superscript letters in the same row indicate significant differences between groups ( $P < 0.05$ ).

Table S7. Effects of phage cocktail on the digestive enzymes' activity of jejunal digesta

| Digestive enzyme<br>(U/mgprot) | CON             | Phage           | <i>P</i> -value |
|--------------------------------|-----------------|-----------------|-----------------|
| Lipase                         | 0.17±0.04       | 0.12±0.02       | 0.313           |
| Trypsin                        | 6643.52±1655.35 | 4355.24±1389.83 | 0.313           |
| Amylase                        | 13.68±6.69      | 10.46±2.41      | 0.660           |

Table S8. Effects of phage cocktail on the intestinal morphology of piglets

| Indexes                    | CON          | Phage        | <i>P</i> -value |
|----------------------------|--------------|--------------|-----------------|
| Jejunum villus height (μm) | 490.73±94.31 | 443.95±32.13 | 0.649           |
| Jejunum crypt depth (μm)   | 241.98±16.59 | 241.40±15.39 | 0.980           |
| villus height/crypt depth  | 2.10±0.46    | 1.85±0.13    | 0.608           |

Table S9. Effects of phage cocktail on the  $\alpha$  diversity of fecal microbiota of piglets

| Indexes  | Day 11         |                |                 | Day 21         |                |                 |
|----------|----------------|----------------|-----------------|----------------|----------------|-----------------|
|          | CON            | Phage          | <i>P</i> -value | CON            | Phage          | <i>P</i> -value |
| Observed | 2158.83±187.43 | 1954.67±108.35 | 0.368           | 1975.17±87.22  | 1780.50±190.35 | 0.374           |
| Chao1    | 3023.83±214.83 | 2680.03±134.98 | 0.205           | 2799.16±145.53 | 2524.54±250.00 | 0.365           |
| ACE      | 3056.70±226.76 | 2748.87±137.03 | 0.272           | 2842.13±132.76 | 2545.82±259.44 | 0.333           |
| Shannon  | 5.32±0.12      | 5.25±0.12      | 0.680           | 5.18±0.08      | 5.09±0.17      | 0.667           |
| Simpson  | 0.98±0.005     | 0.98±0.003     | 0.831           | 0.98±0.003     | 0.97±0.005     | 0.511           |
